# Supplementary material for: Increased catalytic productivity for nanofiltration-coupled Heck reactions using highly stable catalyst systems
Source: Royal Society of Chemistry journal article supplement (doi:10.1039/b203232p), 2002-01-01
Supplement: b203232p.doc [file b203232p.doc]

**Supplementary Material (ESI) for Green Chemistry**

**This journal is © The Royal Society of Chemistry 2002**

**Table S1** Detailed results summary for system I “Pd-phosphine” - membrane STARMEM 122 use & dispose

| Reaction-Filtration Cycle | Flux  (l.m-2.hr-1) | RPd | RP(tol)3 | Cumulative TON  (mol converted react.mol Pd -1) | Mean TOF  (TON hr-1) |
| --- | --- | --- | --- | --- | --- |
| Initial | - | - | - | 99.24 | 21.56 |
| 1 | 41.54 | 0.951 | 0.933 | 196.60 | 8.18 |
| 2 | 46.04 | 0.971 | 0.951 | 293.68 | 10.31 |
| 3 | 40.41 | 0.962 | 0.929 | 393.44 | 10.18 |
| 4 | 36.15 | 0.976 | 0.922 | 493.07 | 8.98 |
| 5 | 38.83 | 0.968 | 0.953 | 590.01 | 3.40 |
| 6 | 43.25 | 0.959 | 0.949 | 689.77 | 2.22 |

**Table S2** Detailed results summary for system II “Pd-imidazolylidene” - membrane STARMEM 122 use & dispose

| Reaction-Filtration cycle. | Flux  (l.m-2.hr-1) | RPd | RP(tol)3 | Cumulative TON  (mol IB converted  mol initial Pd -1) | Reaction rate  (10-3 mol IB converted hr-1) |
| --- | --- | --- | --- | --- | --- |
| Initial reaction | - | - | - | 98.2 | 12.3 |
| 1 | 34.7 | 0.95 | 0.94 | 192.1 | 11.7 |
| 2 | 30.1 | 0.94 | 0.89 | 285.6 | 4.2 |
| 3 | 30.3 | 0.95 | 0.92 | 380.9 | 7.2 |
| 4 | 25.4 | 0.94 | 0.96 | 473.6 | 5.4 |
| 5 | 14.6 | 0.94 | 0.92 | 569.5 | 8.4 |
| 6 | 21.2 | 0.95 | 0.94 | 668.0 | 4.2 |
| 7 | 21.2 | 0.95 | 0.93 | 764.7 | 8.4 |
| 8 | 21.6 | 0.95 | 0.96 | 862.8 | 8.0 |
| 9 | 21.3 | 0.93 | 1 | 957.7 | 6.2 |
| 10 | 22.6 | 0.95 | 1 | 1053.8 | 5.1 |

**Table S3** Detailed results summary for system III “Pd-quat” – membrane STARMEM 122 use & dispose

| Reaction-Filtration cycle. | Flux  (l.m-2.hr-1) | RPd | Cumulative TON  (mol IB converted  mol initial Pd –1) | Reaction rate  (10-3 mol IB converted hr-1) |
| --- | --- | --- | --- | --- |
| Initial reaction | - | - | 96.6 | 4.6 |
| 1 | 35.2 | 0.94 | 172.6 | 2.21 |
| 2 | 34.2 | 0.95 | 251.2 | 1.3 |

**Table S4** Detailed results summary for system IV “Pd-quat-MeCN” - membrane MPF60 reused

| Reaction-Filtration cycle. | Flux  (l.m-2.hr-1) | RPd | Cumulative TON  (mol IB converted  mol initial Pd -1) | Reaction rate  (10-3 mol IB converted hr-1) |
| --- | --- | --- | --- | --- |
| Initial reaction | - | - | 93 | 4.4 |
| 1 | 41.8 | 0.92 | 193 | 9.3 |
| 2 | 37.3 | 0.95 | 293 | 9.4 |
| 3 | 41.0 | 0.90 | 388.4 | 8.9 |
| 4 | 38.1 | 0.92 | 482.3 | 8.8 |
| 5 | 39.0 | 0.90 | 575.6 | 8.8 |
| 6 | 37.8 | 0.91 | 670.4 | 8.9 |
| 7 | 37.6 | 0.92 | 763.2 | 8.7 |
| 8 | 37.2 | 0.92 | 863.2 | 9.4 |
| 9 | 30.8 | 0.93 | 963.2 | 9.4 |
| 10 | 40.2 | 0.92 | 1063.2 | 9.4 |
